1 **Community structure and sample size affect estimates of predation intensity and prey**  
2 **selection: A model-based validation**

3

4 Madhura Bhattacharjee, Devapriya Chattopadhyay\*

5

6

7 RRH: COMMUNITY STRUCTURE AFFECTS INFERRED PREDATION

8

LRH: BHATTACHERJEE AND CHATTOPADHYAY

9

10 Keyword: Drilling predation, durophagous predation, evenness, sampling, predation  
11 intensity

12

13 \* Corresponding author

14 Email: devapriya@iiserpune.ac.in

15

16 *Abstract.* –

17 Predation estimates inferred from the preserved records of predation traces are  
18 essential in evaluating the evolutionary effect of ecological interactions. It is, however,  
19 rarely investigated how sampling intensity and community composition of an assemblage  
20 influence the reliability of these measures.

21 Using a resampling technique, we evaluated the effect of evenness and sampling  
22 intensity of a community on the inferred predation estimates. We theoretically simulated  
23 model communities representing different levels of evenness ( $E_T$ ), predation intensity ( $PI_T$ ),  
24 and predatory behavior (selective, non-selective). These communities were resampled  
25 without replacement; we noted the variation in the inferred predation intensity ( $PI_{T.inf}$ ) and  
26 the number of prey species ( $S_{prey.inf}$ ) during resampling. Our results demonstrate that  $E_T$  does  
27 not influence  $PI_{T.inf}$  for non-selective predation. However, communities with highly selective  
28 predation are sensitive to evenness and sampling intensity;  $PI_{T.inf}$  of these assemblages can  
29 substantially deviate from the actual value.  $S_{prey.inf}$  is also influenced by  $E_T$ , predation  
30 selectivity, and  $PI_T$ . For non-selective predation, sampling intensity heavily influences  
31 communities with low  $E_T$  and low  $PI_T$ ;  $S_{prey.inf}$  is underrepresented at smaller sample size.  
32 For prey-abundance guides selective predation, the sensitivity depends on the nature of  
33 selection; for communities of low  $E_T$  and  $PI_T$  where rare species are attacked preferentially,  
34 the  $S_{prey.inf}$  deviates significantly at small sample size. We proposed a post-facto  
35 standardization method for comparing predation estimates of discrete communities. We  
36 validated its utility using the published predation data of the Plio-Pleistocene molluscan  
37 fossil assemblage. This approach provides critical insight into the biological reliability of  
38 predator estimates across time and space.

39 *Madhura Bhattacharjee, Department of Earth and Climate Science, IISER Pune, Dr. Homi*

40 *Bhaba Road, Pashan, Pune-411008, INDIA*

41 *Devapriya Chattopadhyay, Department of Earth and Climate Science, IISER Pune, Dr.*

42 *Homi Bhaba Road, Pashan, Pune-411008, INDIA, Email: devapriya@iiserpune.ac.in*

43

44

## Introduction

45 The role of predation as a major driving force of evolution in marine ecosystems has been a  
46 common theme of study (Paine, 1966; Vermeij, 1977; Signor and Brett, 1984; Langerhans,  
47 2007; Stanley, 2008). The relationship between the prey and predator is complex in  
48 theoretical and inferential terms (Abrams, 1989; Leighton, 2002). It is important to note that  
49 efforts to evaluate the evolutionary effects of predation relies on the correct measurement of  
50 aspects of predation such as intensity, selectivity of prey. The accurate estimation of  
51 predation measures is, therefore, of primary importance.

52 For establishing predation events and inferring predation intensities, ecological  
53 studies use direct observations or indirect measures such as compositional characterization  
54 of digested food and fecal matter (Nilsen et al., 2012; Pringle et al., 2019). Although it is  
55 possible to recover direct observational evidence of predation events in past ecosystems by  
56 studying “caught-in-the-act” occurrences, paleoecological studies primarily rely on  
57 preserved predation traces (Klompaker et al., 2019). Traces, such as drill holes and repair  
58 scars recording the predation attempts on the prey’s hard shells, are some of the best  
59 quantifiable proxies for inferring predation intensity and prey selection (Kowalewski, 2002).  
60 The frequency of these traces (repair scar frequency (RF) and drilling frequency (DF)) are  
61 often used to evaluate the evolutionary impact of predation in deep time (Vermeij, 1987;  
62 Kelley and Hansen, 1996).

63 Inferences about interactions from predation traces have their limitations. The  
64 implicit assumption for such interpretation is that other processes do not alter the  
65 quantitative data provided by predation traces (e.g., the overall frequency of traces,  
66 distribution of traces across prey species, and prey size classes). It is recognized that biases

67 introduced through taphonomy may influence the biological reliability of these measures,  
68 including frequency (Roy et al. 1994; Zuschin and Stanton, 2001, Chattopadhyay et al.,  
69 2013a, b, Sarkar et al., 2021), prey selection (Sime and Kelley 2016; Forcino et al. 2017),  
70 and size selection (Kowalewski, 2002). However, the effect of sampling on inferred  
71 predation measures remains largely unexplored.

72 A few studies have examined the impact of size-specific sampling on inferred  
73 predation intensities (Chattopadhyay et al., 2016; Hattori et al., 2014; Hausmann et al.,  
74 2018; Kowalewski and Hoffmeister, 2003; Ottens et al., 2012; Visaggi and Kelley, 2015).  
75 Smith et al. (2021) demonstrated the effects of overdispersion and zero inflation (e.g., the  
76 poor model fits) using count data of predation traces. Aspects of a specific community such  
77 as evenness, selectivity of predation, and sampling intensity may influence the estimates of  
78 predation intensity. This becomes crucial for studies that combine predation data from  
79 discrete samples and reconstruct temporal/spatial changes in predation patterns.  
80 Using theoretical simulation based on a resampling technique, we developed a  
81 methodological framework to understand the effect of community evenness, sampling  
82 intensity, and nature of predation selectivity on the inferred predation estimates. We  
83 attempted to estimate these effects on the inferred predation intensity and the number of  
84 prey species. We also proposed a method of post-facto standardization and validated our  
85 approach using predation data from four Plio-Pleistocene fossil assemblages of Florida.

86

## 87 **Materials and method**

88 Indices for predation intensity and community structure:

89 Predation intensity of total assemblage ( $PI_T$ ) is calculated as

90  $PI_T = N_P/N$

91 Where,

92  $N_P$  = Number of individuals with predation mark

93  $N$  = Total number of individuals in the assemblage

94 The total number of prey species is  $S_{prey}$ .  $PI_{prey}$  denotes predation intensity in the species that  
95 have been attacked.

96 The evenness of an assemblage ( $E_T$ ) is calculated as

97  $E_T = H / \ln(S_T)$

98 Where,

99  $H$  = Shannon's diversity index

100  $S_T$  = Total number of species in the assemblage

101

102 Model assemblages:

103 We created 30 hypothetical model assemblages, each with 30 species and 3000  
104 individuals with varying evenness, predation intensity, and prey preferences (Table 1). Each  
105 model assemblage had a unique combination of evenness, predation intensity, and prey  
106 preference. The evenness in these models ranged from a theoretical minimum of 0.1 to a  
107 theoretical maximum of 1. Model assemblages with maximum evenness of one had 100  
108 individuals for 30 species. Assemblages with intermediate evenness of 0.7 had five common  
109 species with 500 individuals each and 25 rare species with 20 individuals each (Table 1).  
110 Assemblages with low evenness of 0.5 had 910 individuals in each of the three common  
111 species and ten individuals in each of the 27 rare species. Assemblages with a very low

112 evenness of 0.2, there is only one common species with 2710 individuals, and the remaining  
113 29 rare species consists of 10 individuals each.

114 The predation intensity of the total assemblage ( $PI_T$ ) was categorized into three  
115 levels: low (0.2), medium (0.5), and high (0.8) (Table 1). A certain number of individuals  
116 from specific species would be considered prey with predation marks as dictated by the  
117 ( $PI_T$ ). The prey-preference of the predator can either be non-selective or selective. In the  
118 case of non-selective predation (Case 1), all species have an equal probability of being  
119 attacked irrespective of their abundance (Fig 1). Selective predation represents assemblages  
120 where prey species have an unequal chance of being attacked depending on their abundance.  
121 In model assemblages with selective predation, we constructed two cases; the predator can  
122 either attack the common species (Case 2) (Fig 2) or the rare species (Case 3) (Fig 3).  
123 Selective predation has not been considered for assemblages with maximum evenness  
124 because all the species are equally abundant and share an equal probability of attack.

125

## 126 Simulation design

127 We performed a simulation to evaluate the effect of sample size on inferred  
128 predation intensity ( $PI_{T.inf}$ ) and the number of prey species ( $S_{prey.inf}$ ) for all the model  
129 assemblages. In the simulation, 100 individuals were drawn randomly from a model  
130 assemblage. The number of attacked individuals ( $N_P$ ) and the number of prey species ( $S_{prey}$ )  
131 represented by the attacked individuals were counted in those 100 individuals. Inferred  
132 predation intensity ( $PI_{T.inf}$ ) for the drawn sample is calculated as a ratio of the number of  
133 attacked individuals and the total number of individuals (i.e., 100 in the first draw). The  
134 exact process is repeated 30 times without replacement until all the individuals from the

135 assemblage are sampled. This entire process was iterated 1000 times. The mean and  
136 standard deviation are calculated for inferred predation intensity ( $PI_{T.inf}$ ) and prey species  
137 richness ( $S_{prey.inf}$ ) for these 1000 iterations for a model assemblage. Deviation of predation  
138 intensity ( $Dev_{PI}$ ) is calculated as the difference between  $PI_T$  and  $PI_{T.inf}$  for an assemblage.  
139 Similarly, the difference between  $S_{prey}$  and  $S_{prey.inf}$  is taken as the deviation of prey species  
140 richness ( $Dev_S$ ). The same technique is applied for all the model assemblages.

141

142 Predation dataset:

143 We used published data on predation records of molluscs from four Pleistocene  
144 localities in Florida (Chattopadhyay and Baumiller, 2010) for validating the proposed  
145 technique. The dataset consists of abundance, drilling frequency, and repair scar frequency  
146 of 14 molluscan species. We drew samples without replacement from each locality with  
147 increasing sample size. The sample size for each draw was a hundred until the last draw; in  
148 the last draw, where the remaining sample size is less than 200, all are drawn. For Punta  
149 Gorda (total=2418 individuals), 100 individuals were drawn 23 times, and 118 individuals  
150 were drawn for the last (24<sup>th</sup>) draw. A similar procedure is followed for Miami Canal (total  
151 = 4794 individuals), Mc Queens pit (total=659 individuals), and Chiquita (total=894  
152 individuals).

153 All simulations and statistical analyses were performed in R (R Core Development  
154 Team, 2012).

155

156

## Results

157 Inferred predation intensity



158           The inferred predation intensity ( $PI_{T.inf}$ ) may vary substantially from the actual value  
159 of overall predation intensity ( $PI_T$ ) and predation intensity of prey groups ( $PI_{prey}$ ), especially  
160 at smaller sample sizes (Fig 4). For non-selective predation (Case 1),  $Dev_{PI}$  is not affected  
161 by the evenness; however, the deviation is high at a smaller sample size and converges to the  
162 actual value with increasing sample size (Fig 5). Evenness influences inferred predation  
163 intensity ( $PI_{T.inf}$ ) when the predation is non-selective (Case 2 and 3) (Fig 4). When the  
164 common species are preferentially attacked (Case 2),  $Dev_{PI}$  is low for communities with  
165 lower evenness and low original predation intensity ( $PI_T$ ) (Fig 6). Communities with higher  
166 evenness showed high  $Dev_{PI}$ . This deviation does not change even at a higher sample size  
167 except for the community with the lowest evenness ( $E_T=0.2$ ) and predation intensity  
168 ( $PI_T=0.2$ ) (Fig 6). When rare species are attacked (Case 3),  $Dev_{PI}$  is high for communities  
169 with higher evenness and high  $PI_T$  (Fig 7). Communities with higher evenness showed lower  
170  $PI_{T.inf}$  values compared to  $PI_T$ . The deviation, however, is lower in comparison to  
171 comparable communities in Case 2.

172

173 Inferred number of prey species

174           The inferred number of prey species ( $S_{prey.inf}$ ) follows a rarefaction curve where  
175  $S_{prey.inf}$  increases with increasing sample size before plateauing and converging to the actual  
176 value of  $S_{prey}$  (Fig 8). In the case of non-selective predation (Case 1), the  $Dev_S$  decreases  
177 with increasing sample size.  $Dev_S$  decreases with increasing evenness at a given sample size  
178 and has lesser sensitivity to sample size when evenness is high.  $Dev_S$  approaches zero at a  
179 smaller sample size in communities with higher evenness (Fig 9). When common species  
180 are preyed upon (Case 2),  $Dev_S$  does not reflect any sensitivity to the sample size (Fig 10).

181 This is due to the low value of  $S_{\text{prey}}$  that converges to its actual value within the first few  
182 draws.

183 However, when the rare species are attacked (Case 3),  $S_{\text{prey.inf}}$  is highly sensitive to the  
184 sample size. Communities with higher evenness tend to show lesser variation in  $\text{Dev}_S$  with  
185 sample size than others (Fig 11-12). The overall  $\text{Dev}_S$  in all the communities is more in  
186 lower  $\text{PI}_T$ .

187

188 Inferred predation estimates from Florida

189 The assemblages from the four localities of Florida are different in terms of their evenness  
190 and sample size (Table 2). Except for Miami canal, all the localities show a case of non-  
191 selective predation represented by the lack of correlation between the relative abundance of  
192 the prey and prey-specific predation intensity ( $\text{PI}_{\text{prey}}$ ) for drilling and durophagous predation  
193 (Table 3). In Miami canal, the significant positive correlation implies that the abundant prey  
194 species are preferentially attacked – a scenario described as Case 2 in our model.

195 For inferred predation intensity ( $\text{PI}_{T.\text{inf}}$ ), there is substantial overlap between three localities  
196 (Punta Gorda, Miami Canal, and Mc Queens pit) for both drilling and durophagy (Fig 13).

197 For inferred prey species richness ( $S_{\text{prey.inf}}$ ), the assemblages show slightly different patterns  
198 between drilling and durophagous predation. For drilling predation, all the assemblages  
199 show a substantial overlap (Fig 13A, C, E). The durophagous predation record, however,  
200 shows a separation between communities with low evenness (Punta Gorda) and high-  
201 evenness (Mc Queens pit, Chiquita) (Fig 13 B, D, F).

202

203

204

## Discussion

205 Paleontological research on predation has expanded rapidly in scope, methods, and  
206 goals over the years. Various studies have focused primarily on identifying the evidence of  
207 fossil records of predation and their interpretation; such records have also been used for  
208 testing ecological and evolutionary hypotheses. In contrast, studies exploring the reliability  
209 of the methods to quantify predation intensity have been limited. While evaluating predation  
210 intensity, the intensity matrices depend more on the number of individuals of a community  
211 and less on the community structure. Our model provides a theoretical framework to  
212 estimate inferred predation intensities for various community structures and sampling  
213 intensities. It highlighted the importance of these factors in influencing the predation  
214 estimates of fossil and recent assemblages; it also demonstrates why it is necessary to  
215 develop a methodological framework of sample standardization before comparing predation  
216 estimates of assemblages separated by time and space.

217

218 Effect on the inferred intensity

219 Our simulation results show that communities' evenness does not significantly change the  
220 inferred predation intensity when random encounters between predator and prey guide  
221 predation. It is, however, uncommon to find predation events to be completely random in the  
222 natural world. The inferred predation intensity may deviate significantly from the original  
223 predation intensity if the predation is selective.

224 Following the considerations of optimal foraging theory, two aspects make the predation  
225 selective. The first is the relative ease with which a predator encounters a prey – a factor  
226 primarily guided by the relative abundance of the prey. With the increasing dominance of a

227 prey species, the probability of encounter increases, and foraging time decreases; this  
228 increases the net energy gain of the predator. The second aspect is the traits (morphological,  
229 ecological, behavioral) of the prey that dictates the net energy gain of the predator. The final  
230 selection by the predator is often a combination of these factors. A higher attack rate may be  
231 found in an abundant prey species due to its higher encounter rate despite its high anti-  
232 predatory defense than a rarer species (Johnson, 1980). This would lead to scenarios similar  
233 to Case 2, where the inferred predation intensity of low-evenness communities would be  
234 higher than the actual predation intensity. This inflation is because of the over-representation  
235 of common species in smaller samples that are primarily attacked.

236 Most often than not, the encounter frequency does not finally dictate the attack frequency,  
237 and the selection of prey is guided by the prey traits such as size (Chattopadhyay et al.,  
238 2014, 2015, 2020). These would be similar to Case 3, where the most dominant groups are  
239 not preyed upon. The inferred predation intensity of low-evenness communities would be  
240 lower than the actual predation intensity. This apparent drop in predation intensity is  
241 because of the lack of representation of rare species in smaller samples that are never  
242 attacked. It is especially problematic because the deviation between  $PI_T$  and  $PI_{T.inf}$  is  
243 substantial for all evenness.

244

245 Effect on inferred selectivity

246 The structure of the community heavily controls the inferred number of prey species.

247 Communities with low evenness deviate significantly from the original prey species and  
248 yield fewer inferred prey species even when the predation is non-selective (Case 1). This  
249 may lead to the development of an artificial selectivity primarily driven by the preferential

250 counting of the dominant species and not by the biological preference demonstrated by the  
251 predators. Therefore, any community with low evenness suffers from the high probability of  
252 underrepresenting the number of prey species. The deviation from the true prey-species  
253 richness is higher for smaller sample size and lower intensity of predation. Communities  
254 with higher predation intensity will provide the true prey-species richness at a smaller  
255 sample size than communities with lower predation intensity. Selective predation (as  
256 indicated by Case 2 and 3) also creates similar deviations.

257 The sensitivity of inferred prey species richness on sample size, evenness, and original  
258 predation selectivity makes the comparison of prey species richness in spatially or  
259 temporally distinct assemblages somewhat unreliable unless they are normalized. This is  
260 especially important when comparing predation estimates from assemblages representing  
261 different time-bins or environments likely to show varying diversity/evenness.

262

### 263 **Proposed protocol of post-facto standardization of predation data**

264 The following protocol may be followed to compare predation intensity and selectivity of  
265 spatially/temporally distinct assemblages to avoid misinterpretation. Using the protocol  
266 described for generating Figure 4, all the assemblages need to be plotted and compared to  
267 understand the sensitivity of the inferred predation intensity ( $PI_{T.inf}$ ) on sample size. If this  
268 plot shows a significant overlap between different assemblages, they should be considered to  
269 represent the same predation intensity ( $PI_T$ ), and the difference in sampling size explains the  
270 difference in the absolute value. To understand the sensitivity of the inferred prey-species  
271 richness ( $S_{prey.inf}$ ) on sample size, the protocol described for generating Figure 5 needs to be  
272 followed for all the assemblages and compared. If this plot shows a significant overlap

273 between different assemblages, they should be considered to represent the same prey-species  
274 richness ( $S_{\text{prey}}$ ), and the difference in sampling size explains the difference in the absolute  
275 value. The assemblage with the smallest sample size can be considered as a reference. The  
276 distribution of inferred predation intensity ( $PI_{T.\text{inf}}$ ) and prey-species richness ( $S_{\text{prey.inf}}$ ) at that  
277 sample size should be compared for all the assemblages using Kolmogorov-Smirnov (K-S)  
278 test. Unless the difference is significant, we cannot reject the possibility of inadequate  
279 sampling generating the difference. We should select the assemblages from a pairwise  
280 comparison of all the assemblages that yield statistical significance. We should choose  
281 assemblages with a larger sample size among the pairs producing without statistical  
282 significance. Using those selected assemblages, we should repeat the entire process at the  
283 smallest sample size of the new subset of the original assemblage. We should continue this  
284 iteration till all the pairs show significant differences. This difference cannot be explained  
285 by sampling and reflects the biological difference. Estimating  $PI_{\text{prey}}$  is difficult, especially  
286 for cases where rare species are attacked; excluding species without any predation trace  
287 while calculating  $PI_T$  may give us some insight.

288

### 289 **Paleontological case study**

290 The assemblages from the four localities of Florida have been used for interpreting the  
291 relationship between durophagy and drilling predation (Chattopadhyay and Baumiller,  
292 2010). However, the study's conclusions did not consider sample size or community  
293 structure. The assemblages are of these localities are pretty different in terms of their  
294 evenness and sample size (Table 2). A selective nature of predation where common prey  
295 species are preferentially attacked is observed for both predations (durophagy and drilling)

296 only in Miami Canal. For inferred predation intensity ( $PI_{T.inf}$ ), the sample size-standardized  
297 resampling protocol (described before) shows a significant difference (Table 4). This  
298 implies that the difference across assemblages cannot be explained by the sampling intensity  
299 or the evenness of the assemblage. Similarly, the sample size-standardized resampling  
300 protocol (described before) yields a significant difference for all the assemblages for  
301 inferred prey species richness ( $S_{prey.inf}$ ) (Table 4). This implies that the difference in the  
302 observed prey-species richness across assemblages cannot be explained by sample  
303 intensity/evenness.

304 It is important to recognize that a number of factors played a role in this particular  
305 case that made these assemblages less susceptible to community evenness and sampling  
306 intensity. Because three localities (Punta Gorda, Mc Queens pit, Chiquita) are showing non-  
307 selective predation, they are less likely to be affected by sample size. Moreover, they have  
308 medium to high evenness that makes them less sensitive to sample size. Miami canal shows  
309 evidence of selective predation where abundant species are preferentially attacked. The  
310 expected deviation in predation intensity of the assemblage of Miami canal, characterized by  
311 low evenness (0.31), low predation intensity ( $PI_T < 0.2$ ) should follow Fig 6A that shows a  
312 low value of  $Dev_{PI}$  at large sample size. Because Miami canal has the largest sample size  
313 among the localities, makes it less likely to be affected by these factors. The expected  
314 deviation in inferred prey species richness ( $Dev_S$ ) of the assemblage of Miami canal should  
315 follow Fig 10A that shows least sensitivity to sample size. Hence, the observed  $S_{prey.drill}$  and  
316  $S_{prey.repair}$  are least likely to be affected by these factors.

317

318

319

## Implications

320 The fossil record of predation has shaped our understanding of how the nature of biotic  
321 interaction changed over time and its role as an evolutionary mechanism. Preserved traces,  
322 such as drill holes and repair scars, are some of the best quantifiable proxies of predation  
323 and they are often used to assess the evolutionary impact of predation in deep time (Vermeij,  
324 1987; Kelley and Hansen, 1996, Huntley and Kowalewski, 2007). Studies aiming to  
325 evaluate the predation trend through time, however, are often forced to use predation data  
326 from discrete assemblages that differ in sample size, inherent community evenness, and the  
327 type of predation selectivity. Our study demonstrates the effect of such factors on the  
328 inferred predation intensity and the recognized prey richness. Comparison between  
329 temporally separated collections, such as Paleozoic and Cenozoic predation records that are  
330 known to be different in the sample size (and probably predatory behavior), are susceptible  
331 to such factors. Our proposed method of post-facto standardization will be essential for such  
332 comparisons and to establish the true nature of biotic interaction through time.

333

334

## Conclusions

335 The effect of community structure and sampling intensity on the inferred predation  
336 estimates is rarely explored. Using a resampling technique, our study demonstrates the  
337 impact of these aspects on the estimates of predation intensity and the number of prey  
338 species. Our results show that the communities with highly selective predation are the most  
339 sensitive to sampling intensity, and the inferred predation intensity of these assemblages can  
340 substantially deviate from the actual value. In contrast, predation intensity for non-selective  
341 predation tends to be unaffected by sampling intensity. Inferred prey-species richness is also



342 influenced by the nature of community evenness, predation selectivity, and actual predation  
343 intensity. For non-selective predation, communities with low evenness and low predation  
344 intensity are highly sensitive to sample size. The inferred prey-species richness can be  
345 underrepresented significantly at smaller sample size. For selective predation, the sensitivity  
346 depends on the nature of selection. The inferred prey-species richness deviates significantly  
347 when rare species are attacked preferentially. Our study also provides a framework of post-  
348 facto standardization of the predation data to remove the effect of sample size/evenness  
349 during comparison. The proposed method will be essential for temporal comparison of pre-  
350 and post-Cretaceous assemblages as they are often characterized by a difference in sample  
351 size/selectivity.

352

353

### **Acknowledgments**

354 This project was supported by the SERB core research grant (CRG/2018/002604). The  
355 IISER Pune Doctoral fellowship supported MB.

356

357

358

## References

- 359 Abrams, P. A. 1989. The evolution of rates of successful and unsuccessful predation.  
360 *Evolutionary Ecology* 3:157-171.
- 361 Chattopadhyay, D., A. Rathie, and A. Das. 2013a. The effect of morphology on postmortem  
362 transportation of bivalves and its taphonomic implications. *Palaios* 28:203-209.
- 363 Chattopadhyay, D., A. Rathie, D. J. Miller, and T. K. Baumiller. 2013b. Hydrodynamic  
364 effects of drill holes on postmortem transportation of bivalve shells and its  
365 taphonomic implications. *Palaios* 28:875-884.
- 366 Chattopadhyay, D., and T. K. Baumiller. 2010. Effect of durophagy on drilling predation: a  
367 case study of Cenozoic molluscs from North America. *Historical Biology* 22:367-  
368 379.
- 369 Chattopadhyay, D., D. Sarkar, S. Dutta, and S. R. Prasanjit. 2014. What controls  
370 cannibalism in drilling gastropods? A case study on *Natica tigrina*. *Palaeogeography,*  
371 *Palaeoclimatology, Palaeoecology* 410:126-133.
- 372 Chattopadhyay, D., M. Zuschin, and A. Tomašových. 2015. How effective are ecological  
373 traits against drilling predation? Insights from recent bivalve assemblages of the  
374 northern Red Sea. *Palaeogeography, Palaeoclimatology, Palaeoecology* 440:659-670.
- 375 Chattopadhyay, D., M. Zuschin, S. Dominici, and J. A. Sawyer. 2016. Patterns of drilling  
376 predation in relation to stratigraphy, locality and sieve size: Insights from the Eocene  
377 molluscan fauna of the Paris Basin. *Palaeogeography, Palaeoclimatology,*  
378 *Palaeoecology* 459:86-98.

- 379 Chattopadhyay, D., V. G. S. Kella, and D. Chattopadhyay. 2020. Effectiveness of small size  
380 against drilling predation: Insights from lower Miocene faunal assemblage of Quilon  
381 Limestone, India. *Palaeogeography, Palaeoclimatology, Palaeoecology* 551:109742.
- 382 Hattori, K. E., P. H. Kelley, G. P. Dietl, N. O. Moore, S. L. Simpson, A. M. Zappulla, K. J.  
383 Ottens, and C. C. Visaggi. 2014. Validation of taxon-specific sampling by novice  
384 collectors for studying drilling predation in fossil bivalves. *Palaeogeography,*  
385 *Palaeoclimatology, Palaeoecology* 412: 199-207.
- 386 Hausmann, I. M., H. Domanski, and M. Zuschin. 2018. Influence of setting, sieve size, and  
387 sediment depth on multivariate and univariate assemblage attributes of coral reef-  
388 associated mollusc death assemblages from the Gulf of Aqaba. *Facies* 64: 1-10.
- 389 Huntley, J. W. and M. Kowalewski. 2007. Strong coupling of predation intensity and  
390 diversity in the Phanerozoic fossil record: *Proceedings of the National Academy of*  
391 *Sciences* 104: 15006–15010.
- 392 Kelley, P. H., and T. A. Hansen. 1996. Naticid gastropod prey selectivity through time and  
393 the hypothesis of escalation. *Palaios* 11: 437-445.
- 394 Klompaker, A. A., P. H. Kelley, D. Chattopadhyay, J. C. Clements, J. W. Huntley, and M.  
395 Kowalewski. 2019. Predation in the marine fossil record: studies, data, recognition,  
396 environmental factors, and behavior. *Earth-science reviews* 194: 472-520.
- 397 Kowalewski, M. 2002. *The Fossil Record of Predation: An Overview of Analytical*  
398 *Methods*. Pp. 3–42 in M. Kowalewski, P.H. Kelley, eds. *The Fossil Record of*  
399 *Predation*. Paleontological Society Papers, vol. 8. Yale University, New Haven.

- 400 Kowalewski, M., and A. P. Hoffmeister. 2003. Sieves and fossils: Effects of mesh size on  
401 paleontological patterns. *Palaios* 18: 460-469.
- 402 Langerhans, R. B. 2007. Evolutionary consequences of predation: avoidance, escape,  
403 reproduction, and diversification. Pp. 177-220 in *Predation in organisms*. Springer,  
404 Berlin, Heidelberg.
- 405 Nilsen, E. B., D. Christianson, J. M. Gaillard, D. Halley, J. DC. Linnell, M. Odden, M.  
406 Panzacchi, C. Toïgo, and B. Zimmermann. 2012. Describing food habits and  
407 predation: field methods and statistical considerations. *Carnivore ecology and*  
408 *conservation: A handbook of techniques*: 256-272.
- 409 Ottens, K. J., G. P. Dietl, P. H. Kelley, and S. D. Stanford. 2012. A comparison of analyses  
410 of drilling predation on fossil bivalves: bulk-vs. taxon-specific sampling and the role  
411 of collector experience. *Palaeogeography, Palaeoclimatology, Palaeoecology* 319:84-  
412 92.
- 413 Paine, R. T. 1966. Food web complexity and species diversity. *The American*  
414 *Naturalist* 100: 65-75.
- 415 Pringle, R. M., T. R. Kartzinel, T. M. Palmer, T. J. Thurman, K. Fox-Dobbs, C. CY Xu, M.  
416 C. Hutchinson, T.C. Coverdale, J.H. Daskin, D.A. Evangelista, and K.M. Gotanda.  
417 2019. Predator-induced collapse of niche structure and species coexistence.  
418 *Nature* 570: 58-64.
- 419 Roy, K., D. J. Miller, and M. LaBarbera. 1994. Taphonomic bias in analyses of drilling  
420 predation: Effects of gastropod drill holes on bivalve shell strength. *Palaios* 9: 413-  
421 421.

- 422 Sarkar, D., G. Deole, S. Paul, S. Mondal, and R. Saha. 2021. Pre-burial taphonomic imprints  
423 on drilling intensity: a case study from the recent molluscs of Chandipur,  
424 India. *Historical Biology* 33: 1457-1463.
- 425 Signor, P. W., and Carlton E. B. 1984. The mid-Paleozoic precursor to the Mesozoic marine  
426 revolution. *Paleobiology* 10: 229-245.
- 427 Sime, J. A., and P. H. Kelley. 2016. Common mollusk genera indicate interactions with their  
428 predators were ecologically stable across the Plio-Pleistocene extinction.  
429 *Palaeogeography, Palaeoclimatology, Palaeoecology* 463: 216-229.
- 430 Smith, J. A., J. C. Handley, and G. P. Dietl. 2021. Accounting for uncertainty from zero  
431 inflation and overdispersion in paleoecological studies of predation using a  
432 hierarchical Bayesian framework. *Paleobiology* :1-18.
- 433 Stanley, S. M. 2008. Predation defeats competition on the seafloor. *Paleobiology* 34:1-21.
- 434 Vermeij, G. H. 1977. The Mesozoic marine revolution: evidence from snails,  
435 predators and grazers. *Paleobiology* 3: 245–258.
- 436 Vermeij, G. H. 1987. *Evolution and Escalation: An Ecological History of Life*. Princeton  
437 University Press, Princeton, New Jersey.
- 438 Visaggi, C. C., and P. H. Kelley. 2015. Equatorward increase in naticid gastropod drilling  
439 predation on infaunal bivalves from Brazil with paleontological implications.  
440 *Palaeogeography, Palaeoclimatology, Palaeoecology* 438: 285-299.
- 441 Zuschin, M., and R. J. Stanton Jr. 2001. Experimental measurement of shell strength and its  
442 taphonomic interpretation. *Palaios* 16: 161-170.

443 **Table caption**

444 Table 1. A summary of the model assemblages used for this study with varying evenness,  
445 predation intensity and predator preference.

446

447 Table 2. A summary of the published predation data from four Plio-Pleistocene fossil  
448 assemblages of Florida (Chattopadhyay and Baumiller, 2010).

449

450 Table 3. The result of Spearman rank order correlation test for proportional abundance and  
451  $PI_{\text{prey}}$  for the predation estimates across four Plio-Pleistocene fossil assemblages of  
452 Florida (Chattopadhyay and Baumiller, 2010). The statistically significant ( $p < 0.05$ )  
453 results are marked in bold.

454

455 Table 4. The test-statistic (D) of Kolmogorov–Smirnov test comparing the predation  
456 estimates across four Plio-Pleistocene fossil assemblages of Florida using sample-  
457 standardization protocol. All the results are statistically significant ( $p < 0.05$ ).

458

459 **Figure caption**

460 Figure 1. An illustrative diagram of nine different molluscan communities with varying  
461 degrees of evenness ( $E_T$ ) and predation intensity ( $PI_T$ ). The predators attacking the  
462 prey are non-selective in their choice (Case 1). Mollusc drawings are from  
463 publicdomainpictures.net with subsequent modification. [Figure 1. Two-column;  
464 Grayscale]

465 Figure 2. An illustrative diagram of nine different molluscan communities with varying  
466 degrees of evenness ( $E_T$ ) and predation intensity ( $PI_T$ ). The predators attacking the  
467 prey are selective and preferentially attack the most abundant prey species (Case 2).  
468 Mollusc drawings are from publicdomainpictures.net with subsequent modification.  
469 [Figure 2. Two-column; Grayscale]

470 Figure 3. An illustrative diagram of nine different molluscan communities with varying  
471 degrees of evenness ( $E_T$ ) and predation intensity ( $PI_T$ ). The predators attacking the  
472 prey are selective in their choice and preferentially attack prey species rare in this  
473 assemblage (Case 3). Mollusc drawings are from publicdomainpictures.net with  
474 subsequent modification. [Figure 3. Two-column; Grayscale]

475 Figure 4. Plot showing variation in inferred predation intensity ( $PI_{inf}$ ) with varying sample  
476 sizes for different model assemblages. The warmer colors represent higher  
477 evenness. The columns indicate increasing predation intensity in the original  
478 assemblage ( $PI_T$ ) from left to right. The rows indicate the different degrees of the  
479 selectiveness of predation, denoted by Case 1, 2, and 3 from top to bottom. [Figure 4.  
480 Two columns; Color]

481 Figure 5. Plot showing deviation of the inferred predation intensity ( $PI_{inf}$ ) from the overall  
482 predation intensity ( $PI_T$ ) with varying sample size for the model assemblages  
483 representing Case 1 (non-selective predation). The rows indicate increasing evenness  
484 from top to bottom. The columns indicate increasing predation intensity in the  
485 original assemblage ( $PI_T$ ) from left to right. The red line represents the overall  
486 predation intensity ( $PI_T$ ), and the grey represents the simulated values for specific  
487 model assemblage. [Figure 4. Two columns; Color]

488 Figure 6. Plot showing deviation of the inferred predation intensity ( $PI_{inf}$ ) from the overall  
489 predation intensity ( $PI_T$ ) with varying sample size for the model assemblages  
490 representing Case 2 (selective predation of the common species). The rows indicate  
491 increasing evenness from top to bottom. The columns indicate increasing predation  
492 intensity in the original assemblage ( $PI_T$ ) from left to right. The red line represents  
493 the overall predation intensity ( $PI_T$ ), and the grey represents the simulated values for  
494 specific model assemblage. [Figure 6. Two columns; Color]

495 Figure 7. Plot showing deviation of the inferred predation intensity ( $PI_{inf}$ ) from the overall  
496 predation intensity ( $PI_T$ ) with varying sample size for the model assemblages  
497 representing Case 3 (selective predation of the rare species). The rows indicate  
498 increasing evenness from top to bottom. The columns indicate increasing predation  
499 intensity in the original assemblage ( $PI_T$ ) from left to right. The red line represents  
500 the overall predation intensity ( $PI_T$ ) and the grey represents the simulated values for  
501 specific model assemblage. [Figure 7. Two columns; Color]

502 Figure 8. Plot showing variation in the inferred number of prey species ( $S_{prey.inf}$ ) with  
503 varying sample sizes for different model assemblages. The warmer colors represent  
504 higher evenness. The columns indicate increasing predation intensity in the original  
505 assemblage ( $PI_T$ ) from left to right. The rows indicate the different degrees of the  
506 selectiveness of predation, denoted by Case 1, 2, and 3 from top to bottom. [Figure 8.  
507 Two columns; Color]

508 Figure 9. Plot showing deviation ( $Dev_s$ ) of the inferred prey species richness ( $S_{prey.inf}$ ) from  
509 the original prey species richness ( $S_{prey}$ ) with varying sample size for the model



510 assemblages representing Case 1 (non-selective predation). The rows indicate  
511 increasing evenness from top to bottom. The columns indicate increasing predation  
512 intensity in the original assemblage ( $PI_T$ ) from left to right. The red line represents  
513 the original prey species richness ( $S_{prey}$ ), and the grey represents the simulated values  
514 for specific model assemblage. [Figure 9. Two columns; Color]

515 Figure 10. Plot showing deviation ( $Dev_s$ ) of the inferred prey species richness ( $S_{prey.inf}$ ) from  
516 the original prey species richness ( $S_{prey}$ ) with varying sample size for the model  
517 assemblages representing Case 2 (selective predation of the common species). The  
518 rows indicate increasing evenness from top to bottom. The columns indicate  
519 increasing predation intensity in the original assemblage ( $PI_T$ ) from left to right. The  
520 red line represents the original prey species richness ( $S_{prey}$ ), and the grey represents  
521 the simulated values for specific model assemblage. [Figure 10. Two columns;  
522 Color]

523 Figure 11. Plot showing deviation ( $Dev_s$ ) of the inferred prey species richness ( $S_{prey.inf}$ ) from  
524 the original prey species richness ( $S_{prey}$ ) with varying sample size for the model  
525 assemblages representing Case 3 (selective predation of the rare species). The rows  
526 indicate increasing evenness from top to bottom. The columns indicate increasing  
527 predation intensity in the original assemblage ( $PI_T$ ) from left to right. The red line  
528 represents the original prey species richness ( $S_{prey}$ ), and the grey represents the  
529 simulated values for specific model assemblage. [Figure 11. Two columns; Color]

530 Figure 12. The plot shows variation in inferred predation intensity ( $PI_{inf}$ ) and inferred the  
531 number of prey species ( $S_{prey.inf}$ ) with specific sample sizes for different model

532 assemblages. The warmer colors represent higher evenness. The columns indicate  
533 increasing predation intensity in the original assemblage ( $PI_T$ ) from left to right. The  
534 rows indicate the different degrees of the selectiveness of predation, denoted by Case  
535 1, 2, and 3 from top to bottom. [Figure 12. Two columns; Color]

536 Figure 13. Plot showing variation in inferred estimates of drilling and durophagous  
537 predation with varying degrees of sampling for four Pleistocene molluscan  
538 assemblages of Florida with different evenness ( $E_T$ ). The top row represents the  
539 sample size variation in inferred predation intensity ( $PI_{inf}$ ). The middle row shows  
540 the inferred number of prey species ( $S_{prey.inf}$ ) with varying sample sizes. The bottom  
541 row represented the relationship between the inferred predation intensity ( $PI_{inf}$ ) and  
542 inferred number of prey species ( $S_{prey.inf}$ ) at specific sizes for the four assemblages.  
543 [Figure 13. Two columns; Color]

$E_T$ 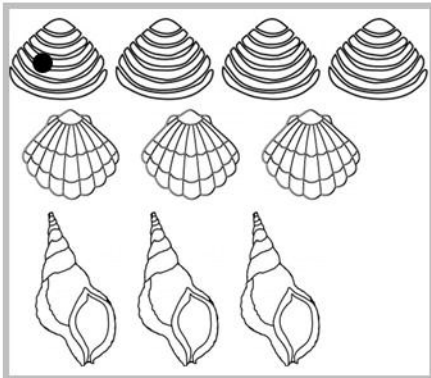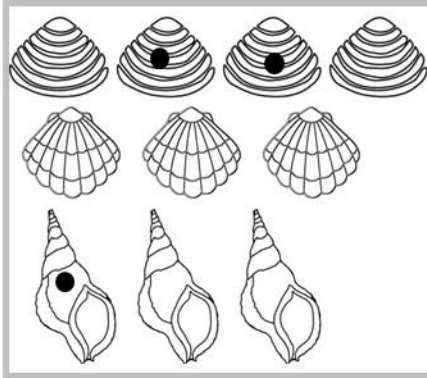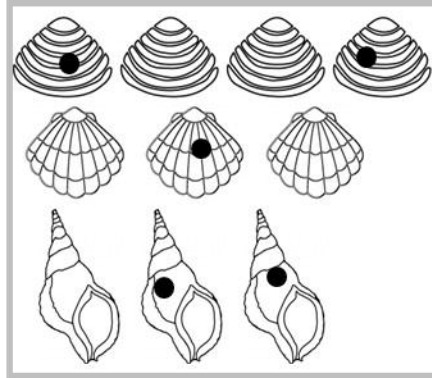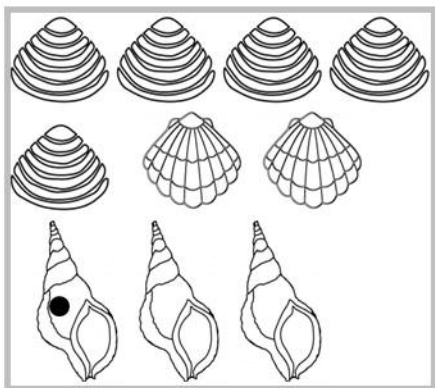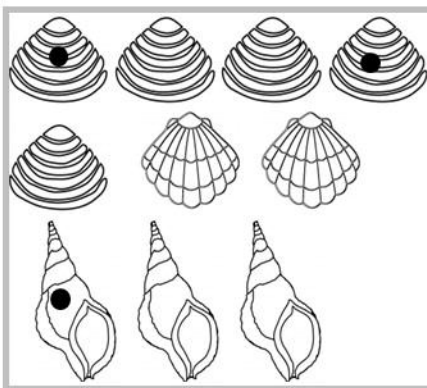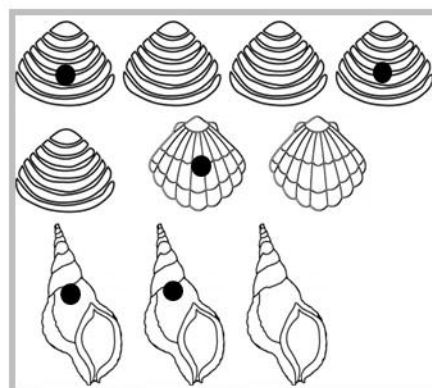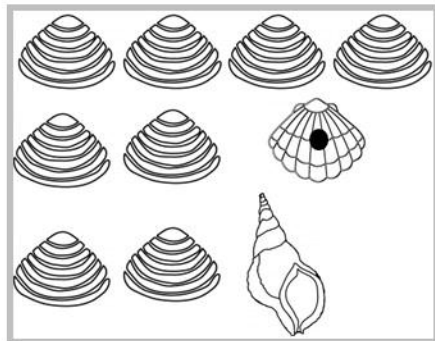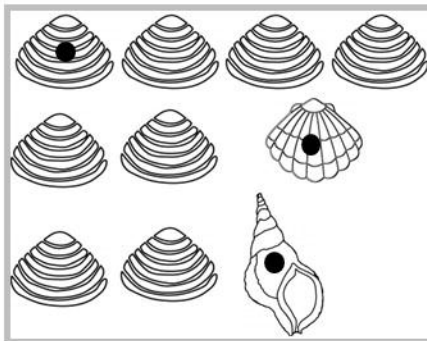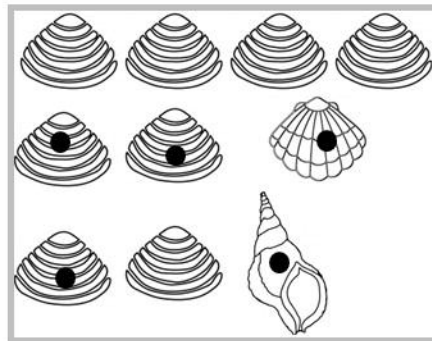 $P_{I_T}$

$E_T$

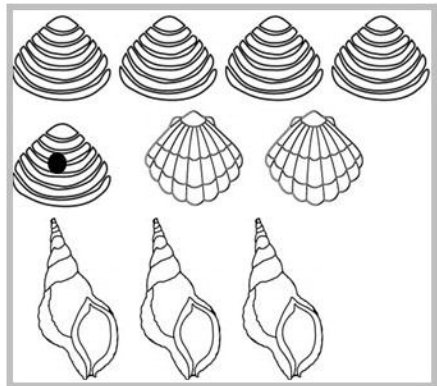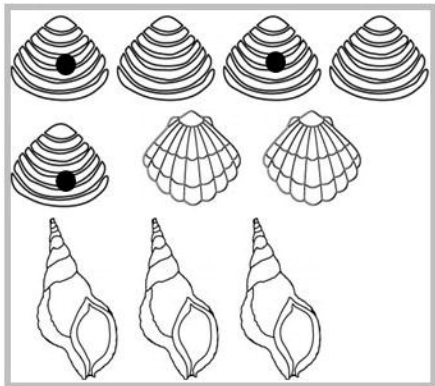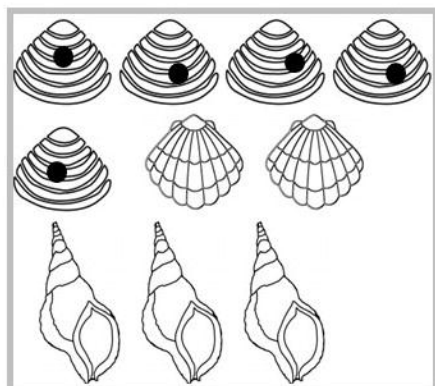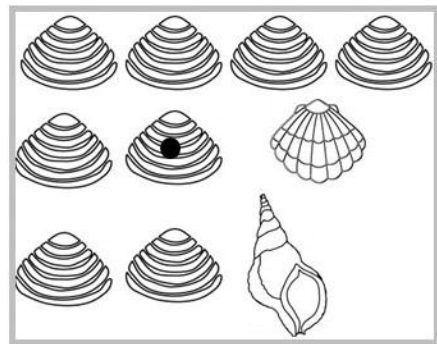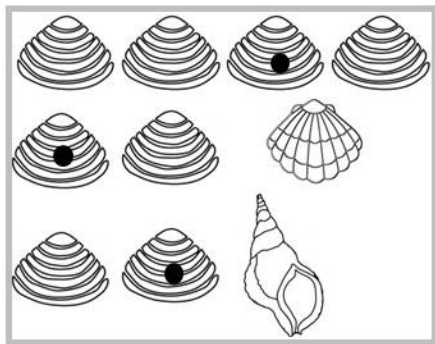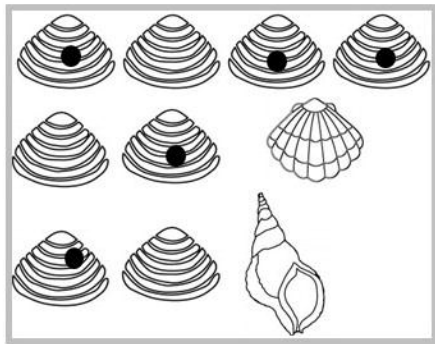

$PI_T$

$E_T$

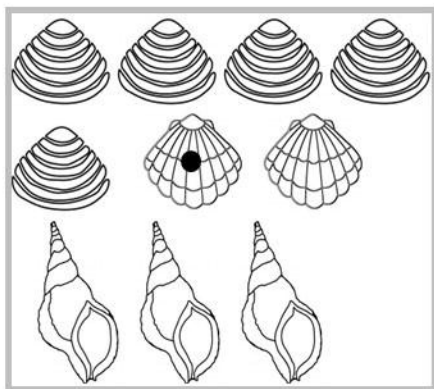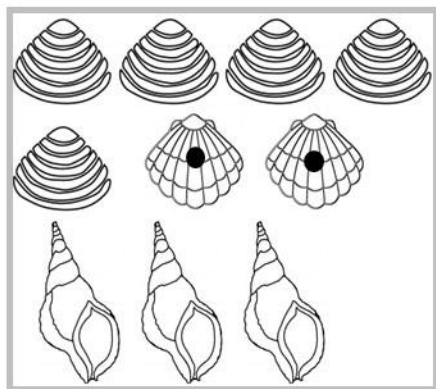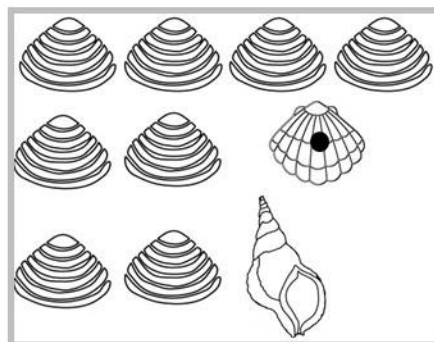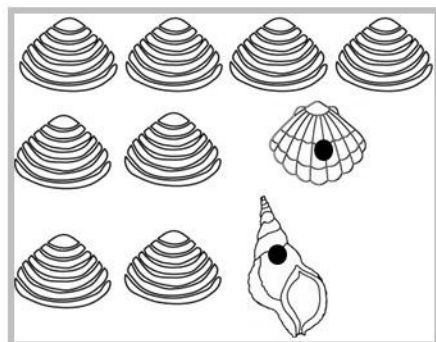

$P_{I_T}$

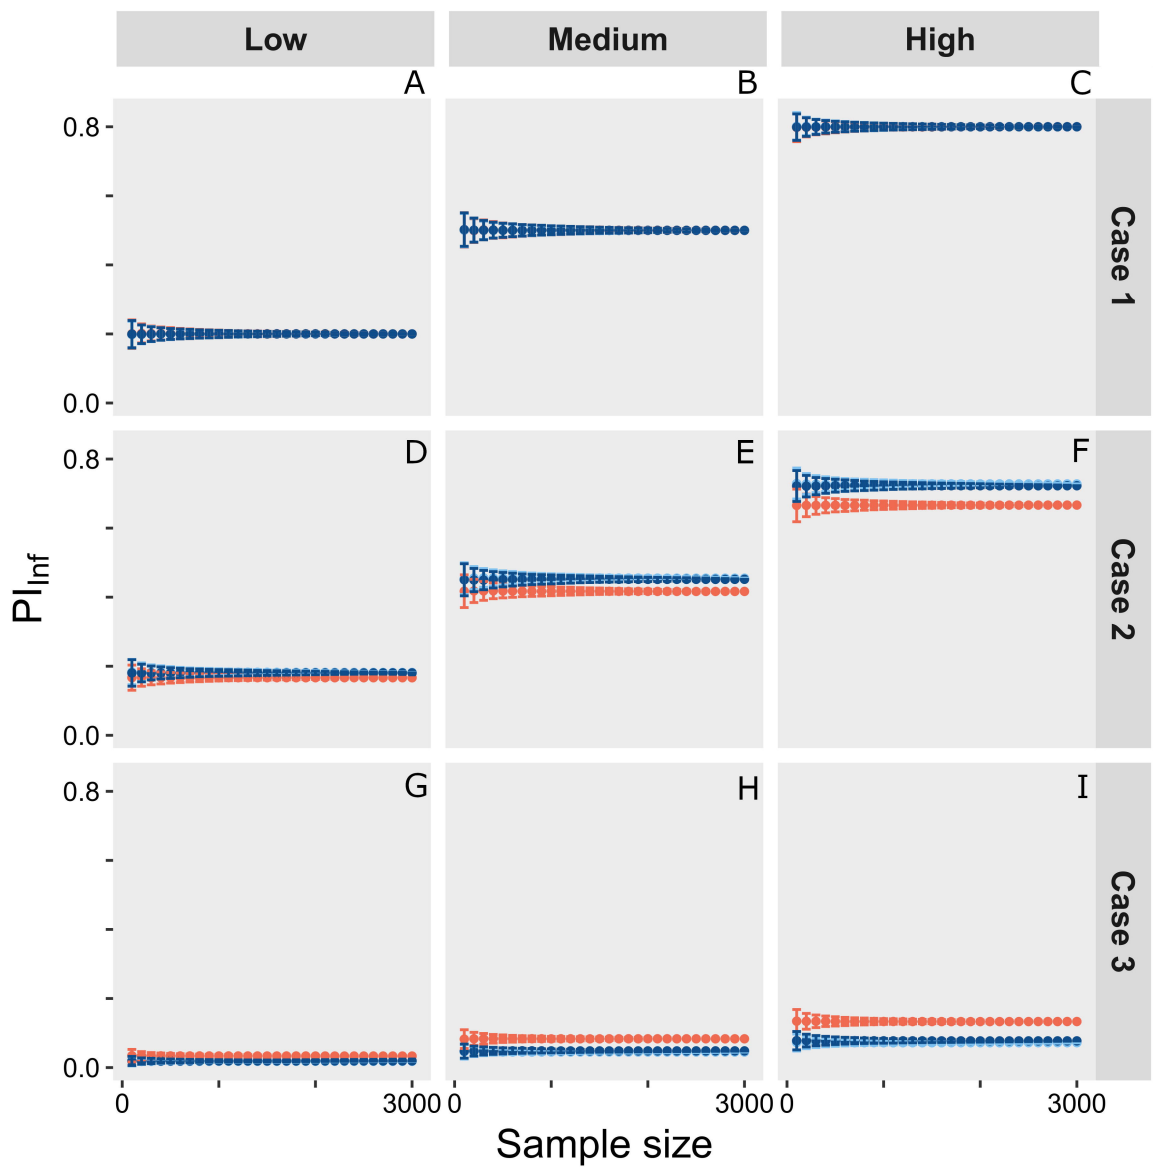

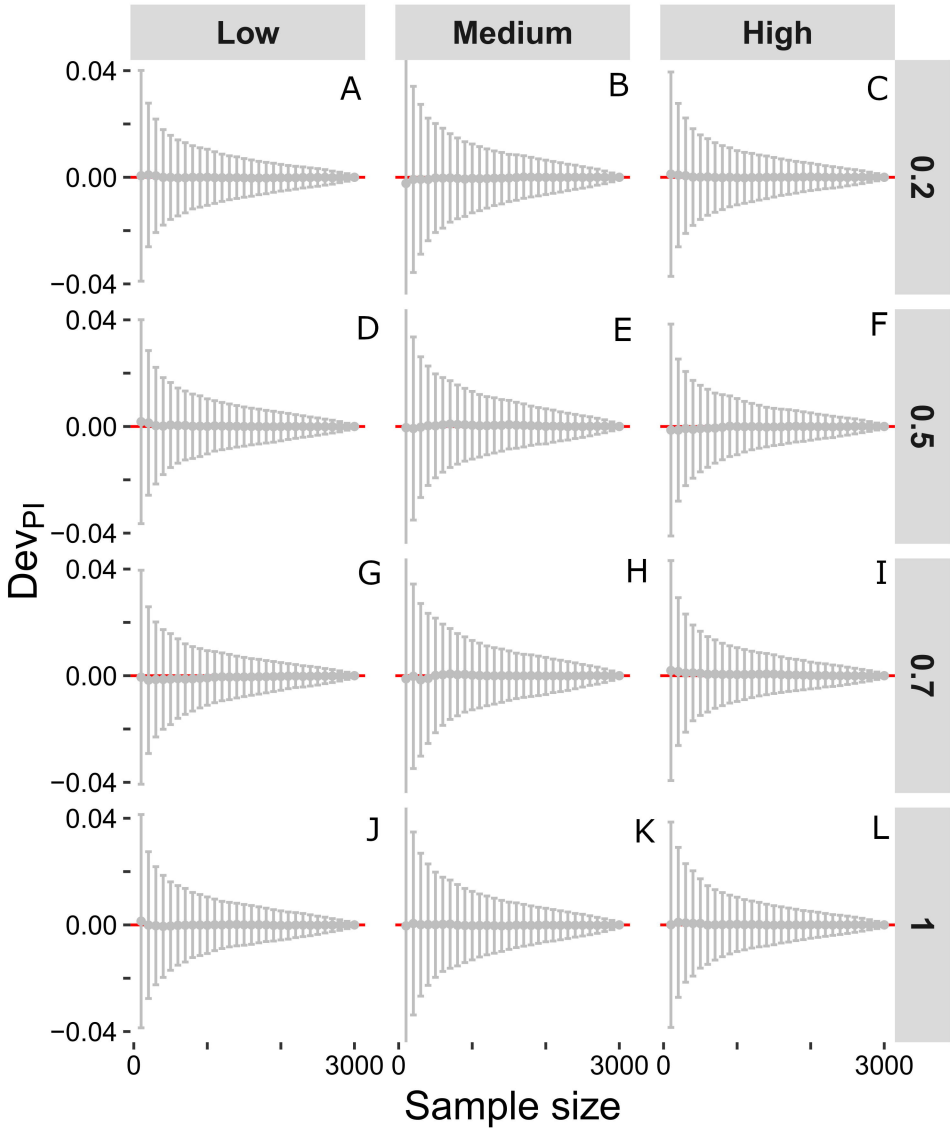

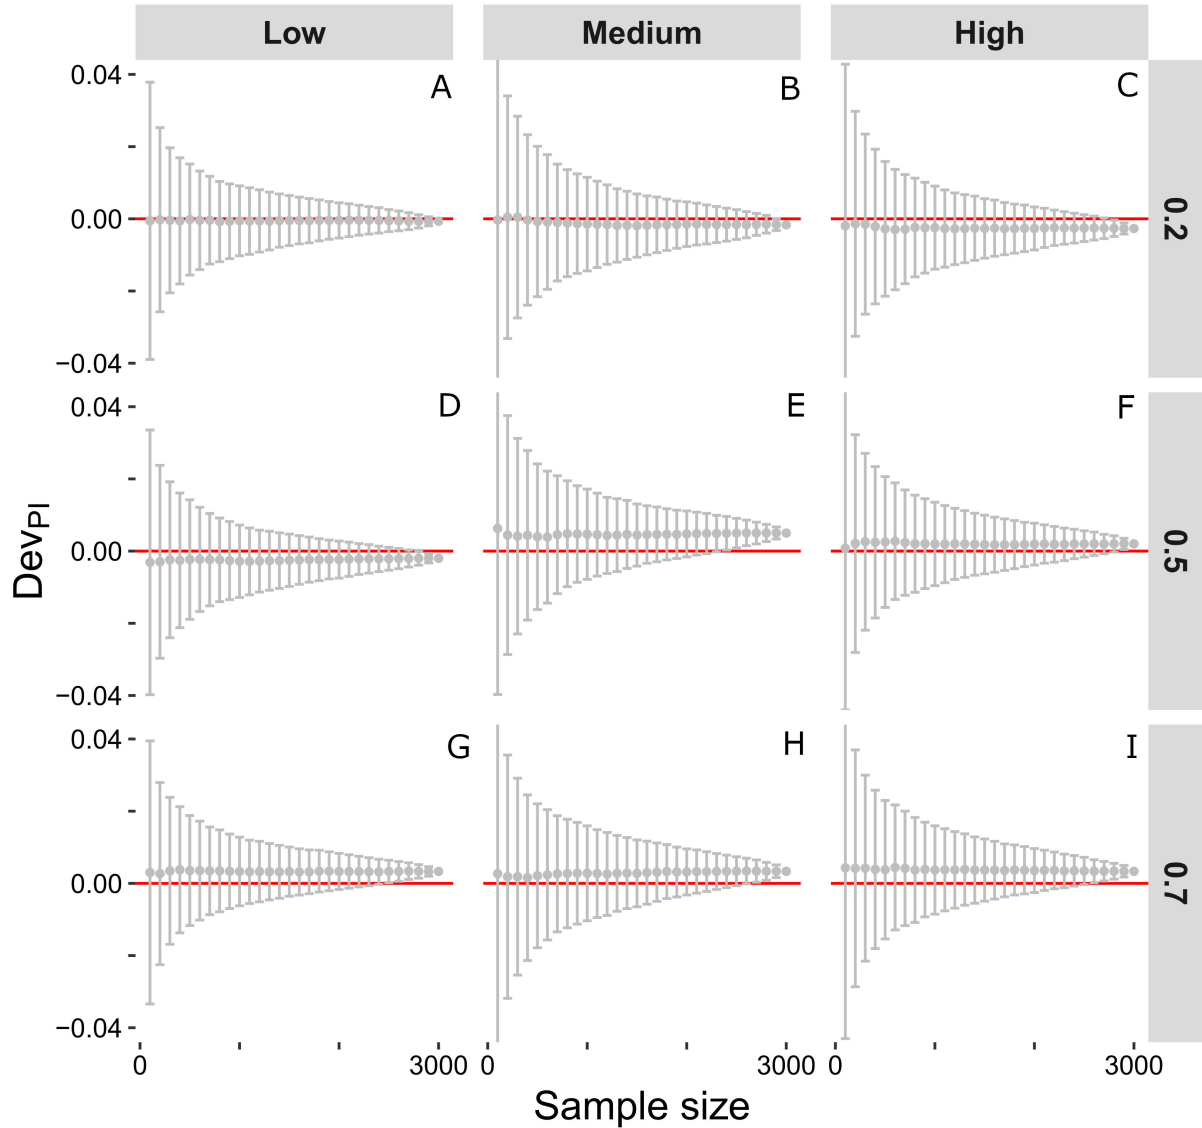



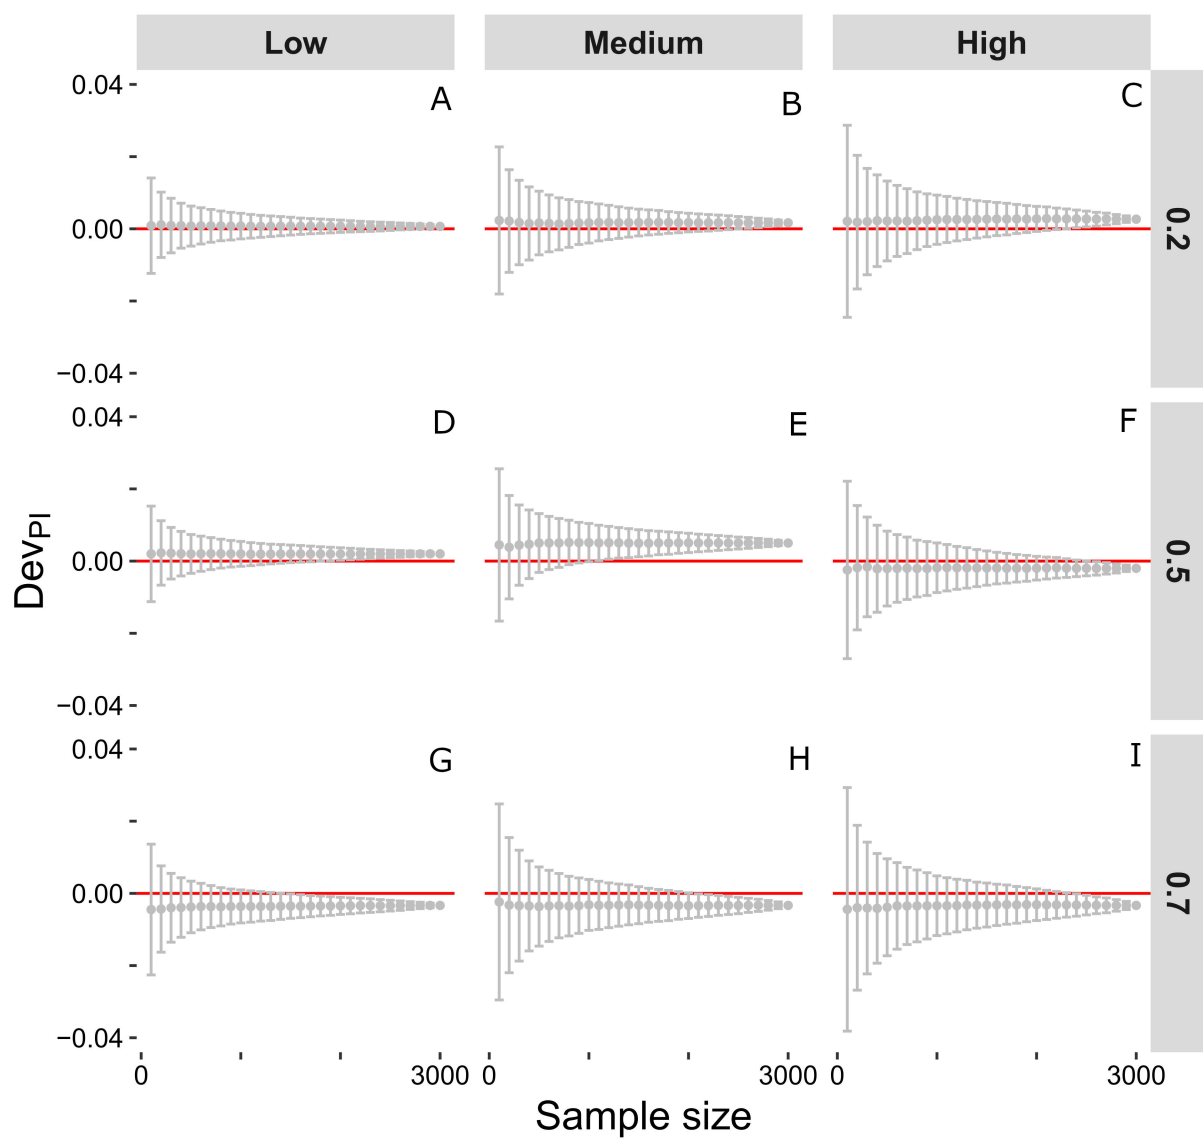

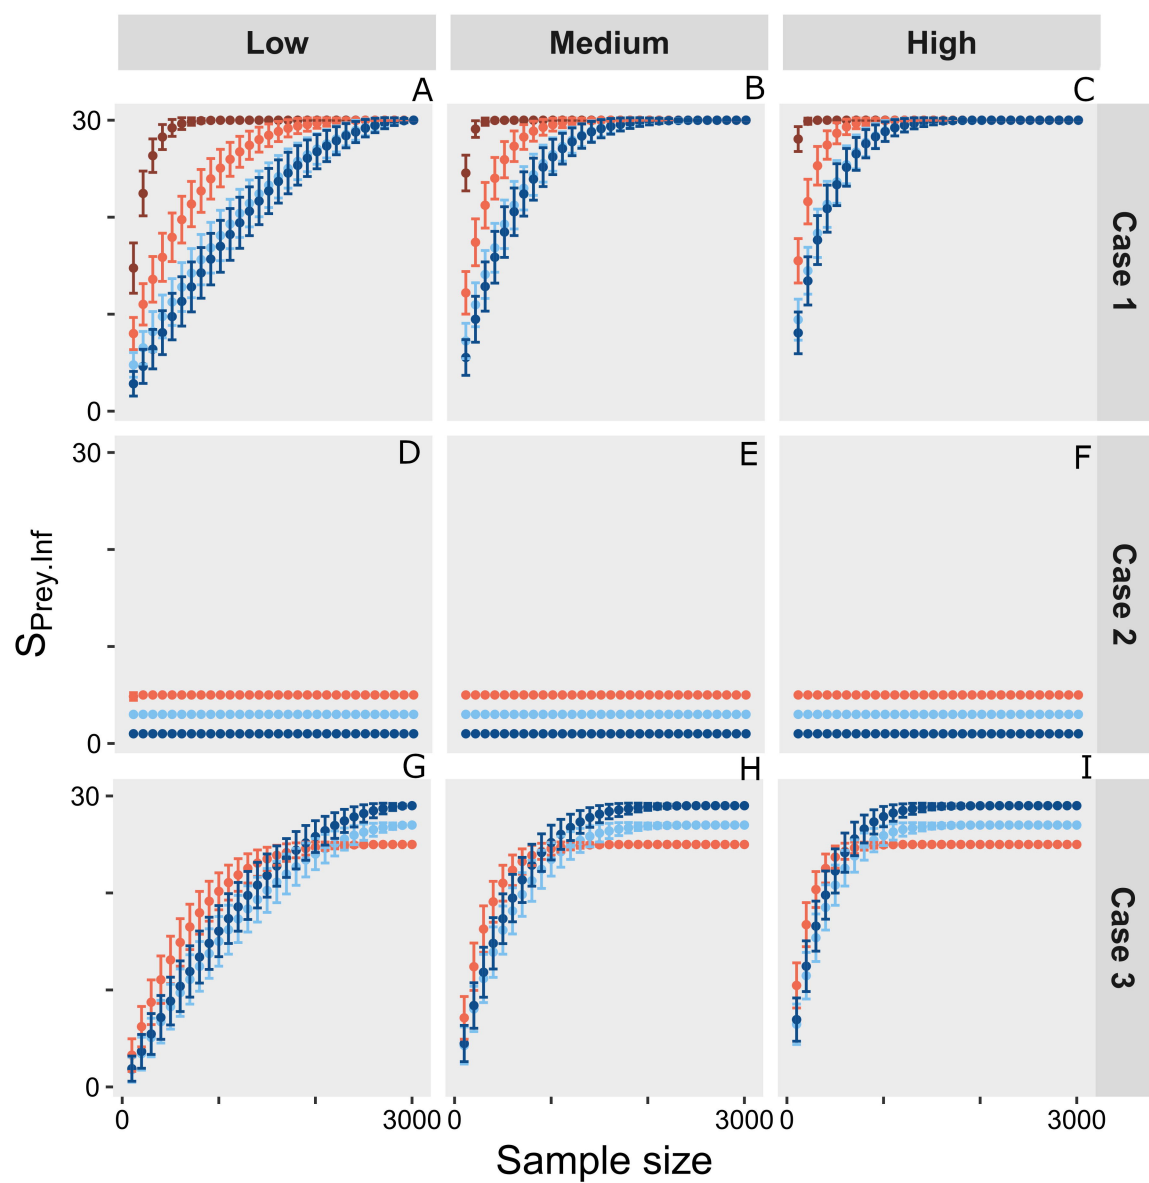

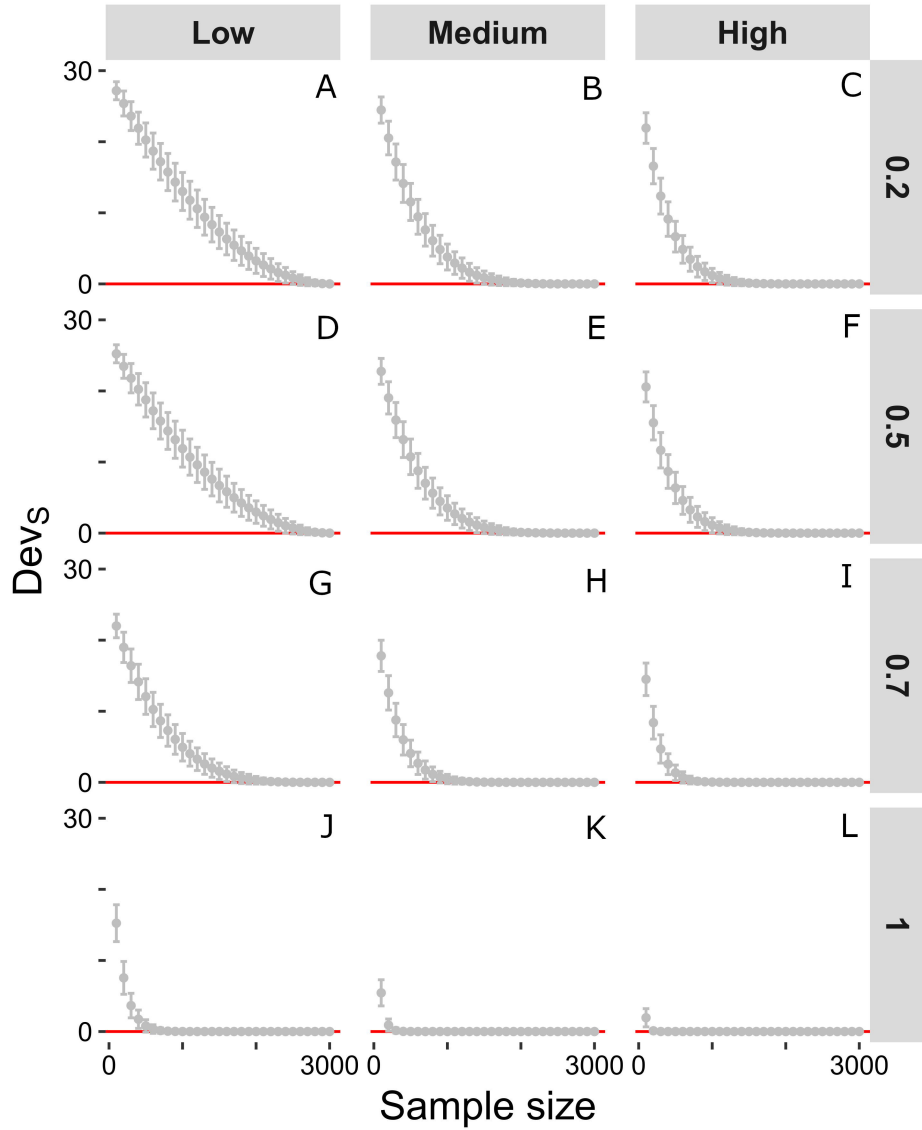

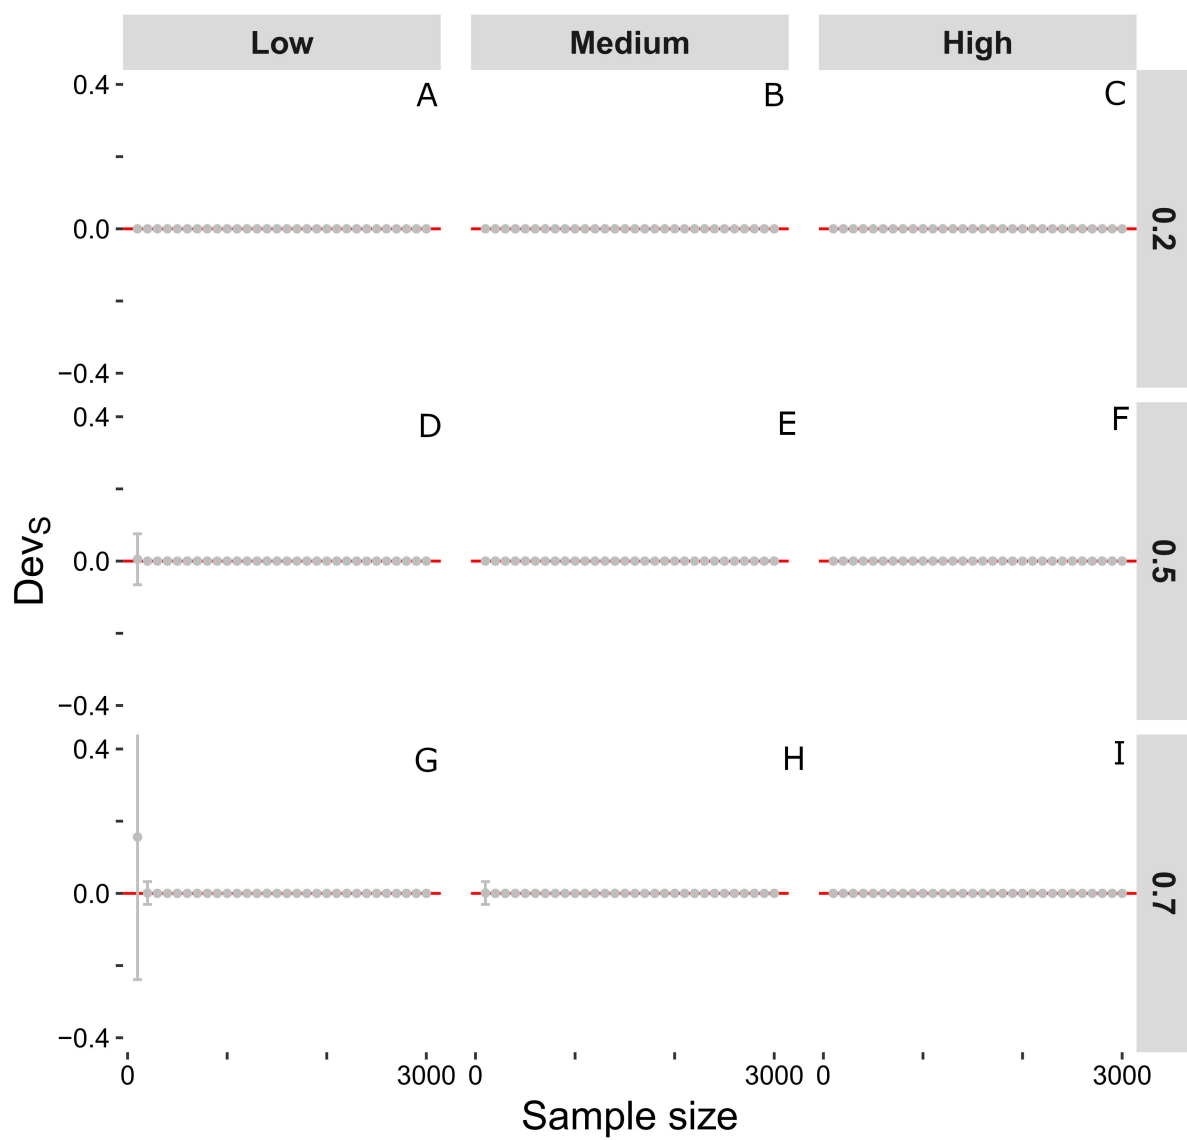

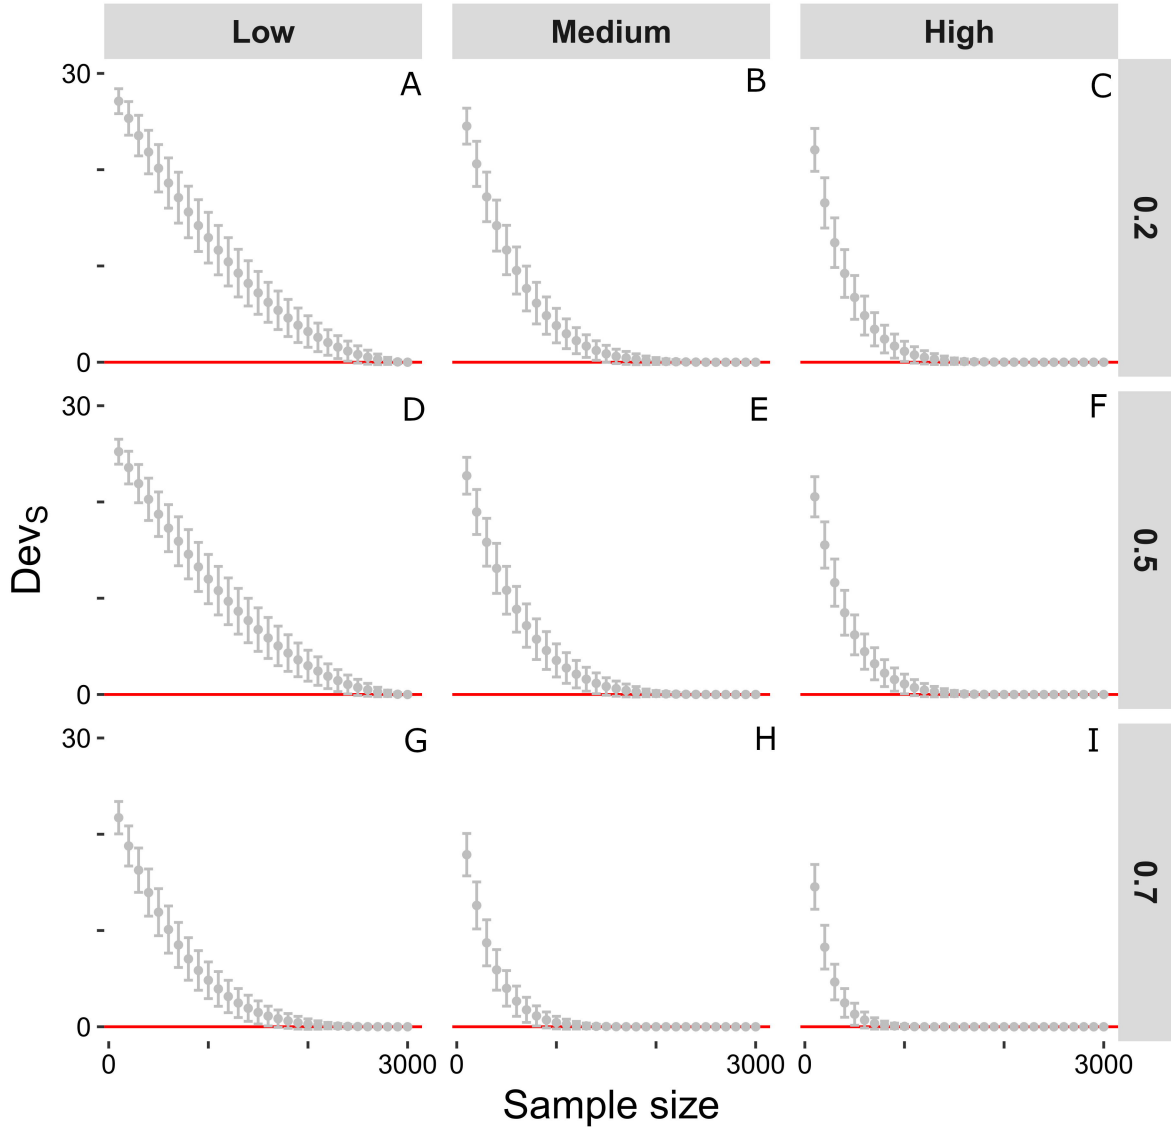

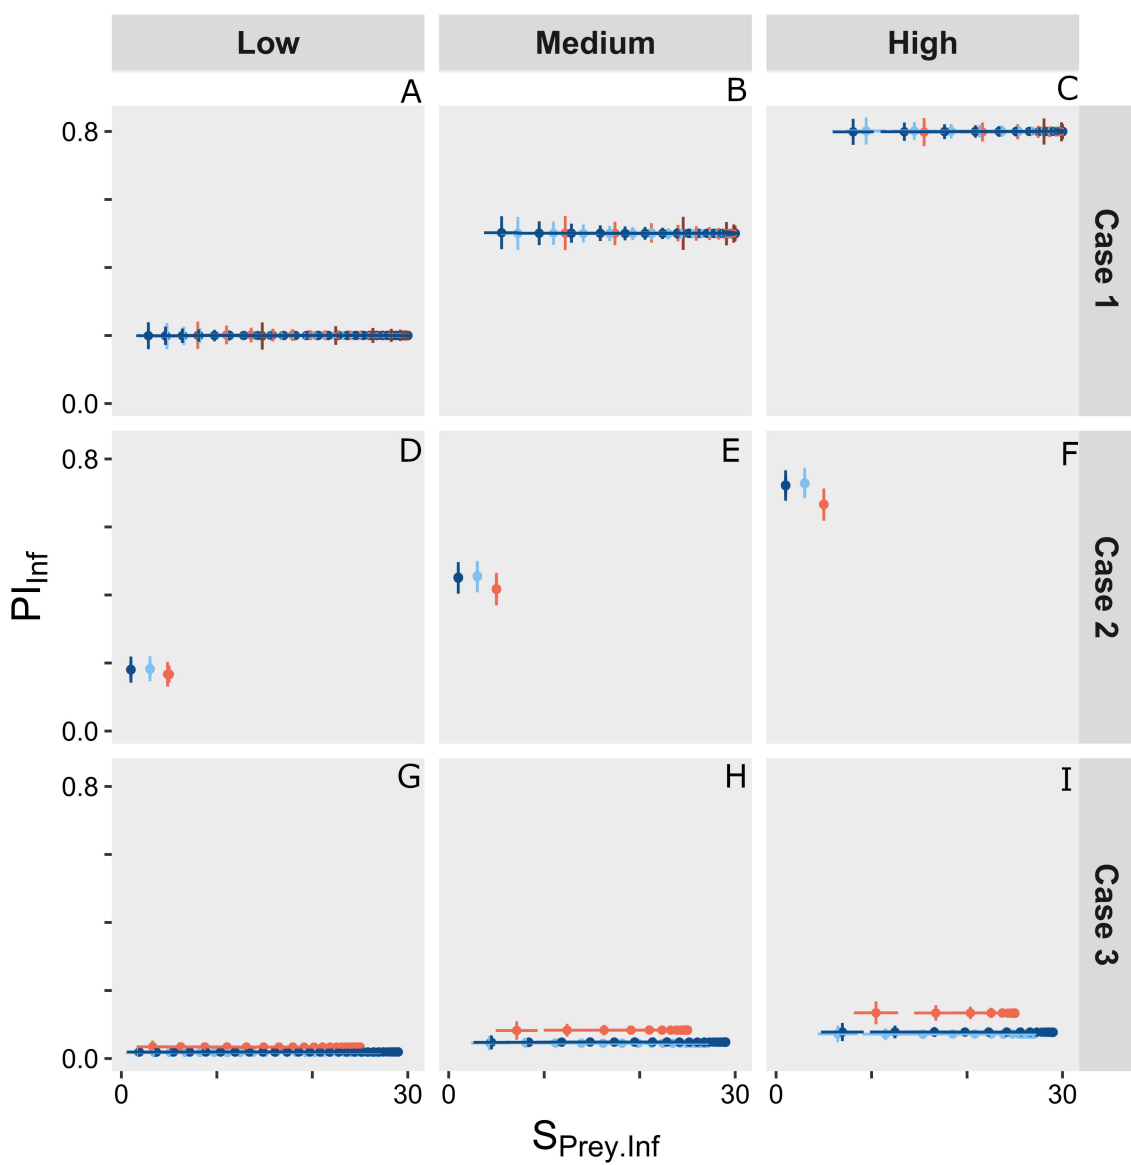

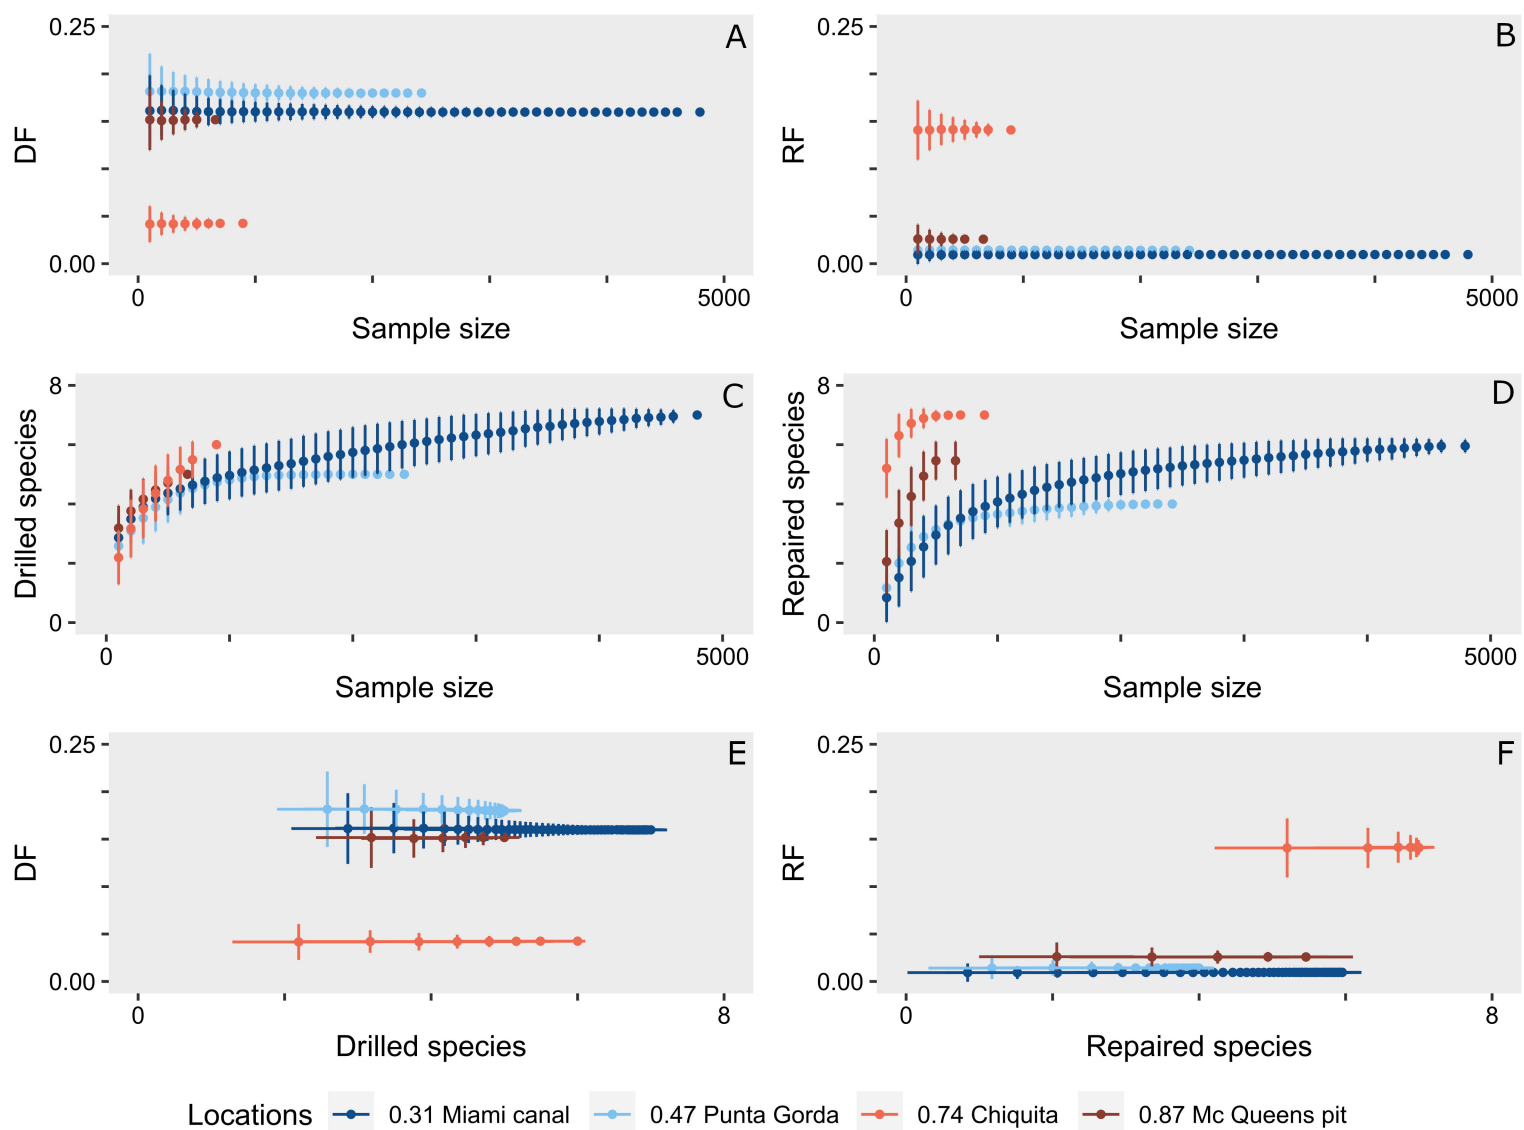





Table 2. A summary of the published predation data from four Plio-Pleistocene fossil assemblages of Florida (Chattopadhyay and Baumiller, 2010).

| Locality      | Evenness ( $E_T$ ) | Sample size | $S_T$ | Drilling frequency | $S_{\text{prey.drill}}$ | Repair scar frequency | $S_{\text{prey.repair}}$ |
|---------------|--------------------|-------------|-------|--------------------|-------------------------|-----------------------|--------------------------|
| Miami Canal   | 0.31               | 4794        | 7     | 0.16               | 7                       | 0.01                  | 6                        |
| Punta Gorda   | 0.47               | 2417        | 5     | 0.18               | 5                       | 0.01                  | 4                        |
| Chiquita      | 0.74               | 894         | 7     | 0.04               | 6                       | 0.14                  | 7                        |
| McQueen's pit | 0.87               | 657         | 6     | 0.15               | 5                       | 0.03                  | 6                        |

Table 3. The result of Spearman rank order correlation test for proportional abundance and  $PI_{prey}$  for the predation estimates across four Plio-Pleistocene fossil assemblages of Florida (Chattopadhyay and Baumiller, 2010). The significant results are marked in bold.

| Predation | Location      | rho         | p                | Inferred scenario |
|-----------|---------------|-------------|------------------|-------------------|
| Drilling  | Punta Gorda   | 0.87        | 0.05             | Case 2            |
|           | McQueen's pit | 0.83        | 0.06             | Case 1            |
|           | Chiquita      | 0.68        | 0.08             | Case 1            |
|           | Miami canal   | <b>0.99</b> | <b>&lt;0.001</b> | Case 2            |
| Durophagy | Punta Gorda   | 0.21        | 0.74             | Case 1            |
|           | McQueen's pit | 0.46        | 0.35             | Case 1            |
|           | Chiquita      | 0.24        | 0.61             | Case 1            |
|           | Miami canal   | <b>0.79</b> | <b>0.03</b>      | Case 2            |

Table 4. The test-statistic (D) of Kolmogorov–Smirnov test comparing the predation estimates across four Plio-Pleistocene fossil assemblages of Florida using sample-standardization protocol. All the results are statistically significant ( $p < 0.05$ ).

| Estimate              | Predation | Location      | McQueen's pit | Chiquita    | Miami Canal |
|-----------------------|-----------|---------------|---------------|-------------|-------------|
| Predation intensity   | Drilling  | Punta Gorda   | <b>0.8</b>    | <b>1</b>    | <b>0.53</b> |
|                       |           | McQueen's pit |               | <b>0.24</b> | <b>0.31</b> |
|                       |           | Chiquita      |               |             | <b>1</b>    |
|                       | Durophagy | Punta Gorda   | <b>0.9</b>    | <b>1</b>    | <b>0.19</b> |
|                       |           | McQueen's pit |               | <b>0.96</b> | <b>0.85</b> |
|                       |           | Chiquita      |               |             | <b>1</b>    |
| Prey species richness | Drilling  | Punta Gorda   | <b>0.38</b>   | <b>0.31</b> | <b>0.13</b> |
|                       |           | McQueen's pit |               | <b>0.24</b> | <b>0.36</b> |
|                       |           | Chiquita      |               |             | <b>0.29</b> |
|                       | Durophagy | Punta Gorda   | <b>0.84</b>   | <b>1</b>    | <b>0.41</b> |
|                       |           | McQueen's pit |               | <b>1</b>    | <b>0.95</b> |
|                       |           | Chiquita      |               |             | <b>1</b>    |
